# Supplementary material
Source: Royal Society of Chemistry journal article supplement (doi:10.1039/d5se01701g)
Supplement: d5se01701g1.pdf [file d5se01701g1.pdf]

## High-Stability High-Capacity Aqueous Sodium-ion Battery Using High Entropy Oxide Cathode: Intercalation Vs Capacitive Sodium Charge Storage

*Sivasubramaniam Ragul, Kalidoss Kannadasan and Perumal Elumalai\**

Electrochemical Energy Storage Lab, Department of Green Energy Technology,  
Madanjeet School of Green Energy Technologies, Pondicherry University,  
Puducherry-605014, India

### Supplementary Information

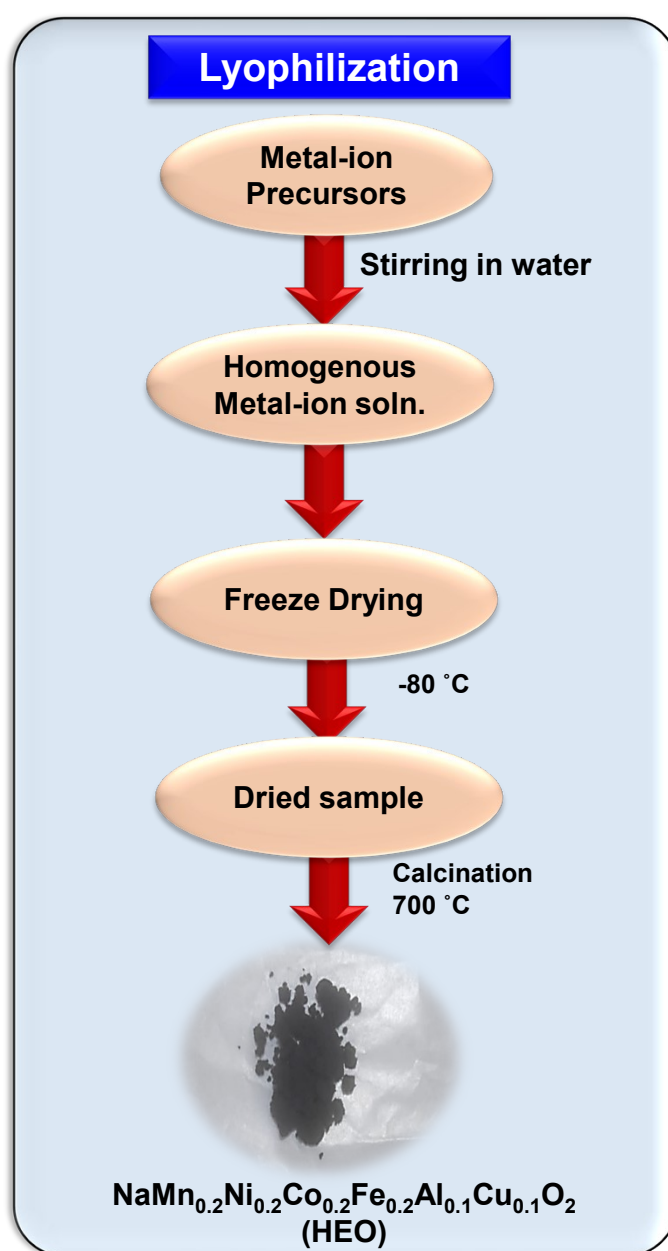

**Fig. S1.** Schematic representation of various steps involved in the synthesis of the HEO cathode.

### Calculation of Configurational Entropy for $\text{NaMn}_{0.2}\text{Ni}_{0.2}\text{Co}_{0.2}\text{Fe}_{0.2}\text{Al}_{0.1}\text{Cu}_{0.1}\text{O}_2$ :

The configurational entropy ( $S_{conf}$ ) of the high entropy metal oxide is calculated as shown below using Boltzmann's equation (after applying Sterling approximation):

$$S_{conf} = -R \left( \sum_i x_i \ln x_i \right)_{\text{cation site}} + \left( \sum_j x_j \ln x_j \right)_{\text{anion site}}$$

|        | Element | Molar concentration | Mole fraction  |
|--------|---------|---------------------|----------------|
| Cation | Na      | 1                   | $1/2 = 0.5$    |
|        | Mn      | 0.2                 | $0.2/2 = 0.1$  |
|        | Fe      | 0.2                 | $0.2/2 = 0.1$  |
|        | Co      | 0.2                 | $0.2/2 = 0.1$  |
|        | Ni      | 0.2                 | $0.2/2 = 0.1$  |
|        | Cu      | 0.1                 | $0.1/2 = 0.05$ |
|        | Al      | 0.1                 | $0.1/2 = 0.05$ |
| Total  |         | 2                   |                |
| Anion  | O       | 2                   | $2/2 = 1$      |
| Total  |         | 2                   |                |

$$S_{conf} = -R [(0.50 \ln 0.50) + (0.10 \ln 0.10) + (0.10 \ln 0.10) + (0.10 \ln 0.10) + (0.10 \ln 0.10) + (0.05 \ln 0.05) + (0.05 \ln 0.05)]_{\text{cation site}} + [(1 \ln 1)]_{\text{anion site}}$$

$$S_{conf} = 1.57R$$

The estimated configurational entropy is 1.57

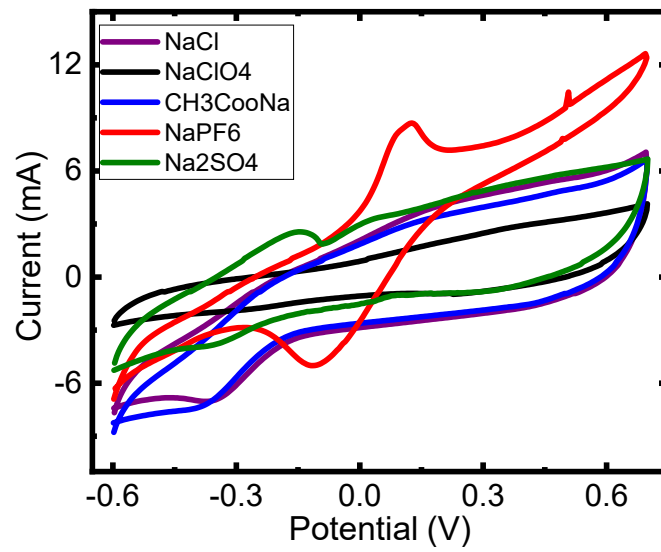

**Fig. S2.** Cyclic voltammograms of the HEO electrode at different scan rates recorded in (a) 1M NaCl (b) 1M NaClO<sub>4</sub> (c) 1M NaPF<sub>6</sub>, (d) 1M CH<sub>3</sub>COONa and (e) 1M Na<sub>2</sub>SO<sub>4</sub> electrolytes.

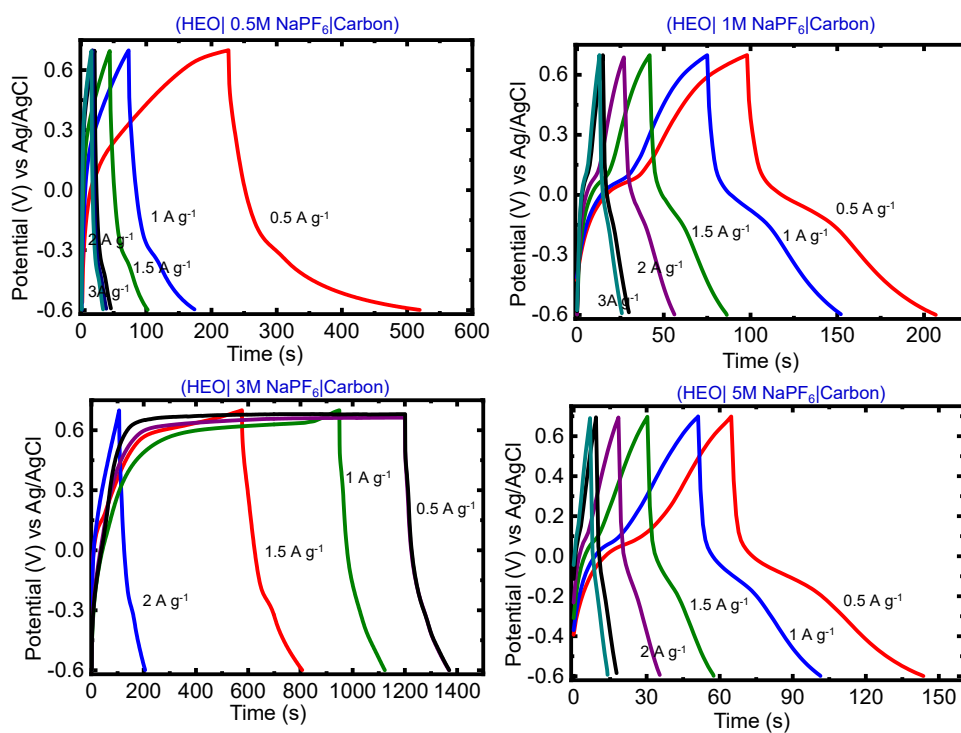

**Fig. S3.** GCD profiles of the HEO cathode at different scan rates recorded in different concentrations of NaPF<sub>6</sub>.

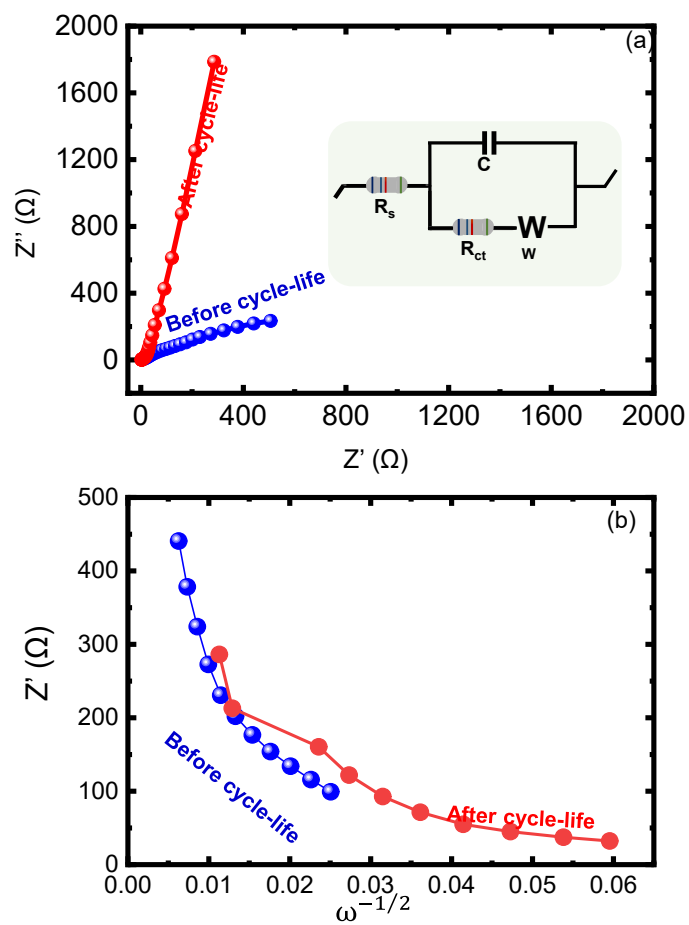

**Fig. S4.** (a) Nyquist plot (b) Linear plot of  $Z'$  vs  $\omega^{-1/2}$  constructed for the aqueous sodium-ion battery before and after cycle

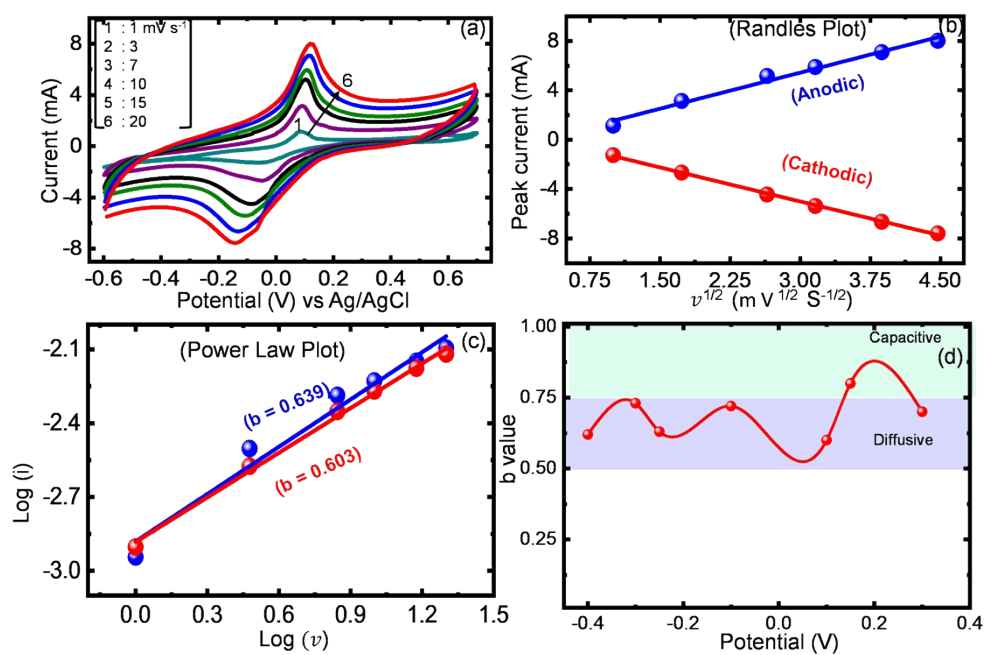

**Fig. S5.** (a) CV profile recorded for the HEO cathode (b) Randles plot (c) Power law plot (d) Linear plot of b-value vs. potential (v)

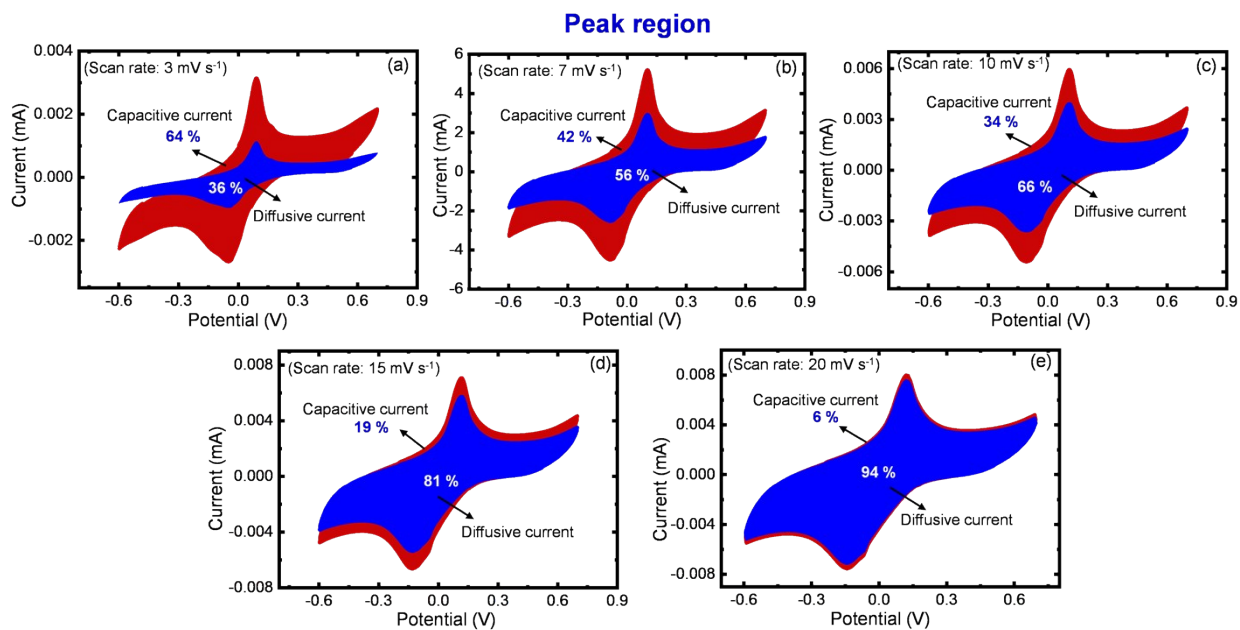

**Fig. S6.** Representative CV profiles at various scan rates marked with the capacitive and the diffusive contributions at peak potential region for the HEO cathodes.

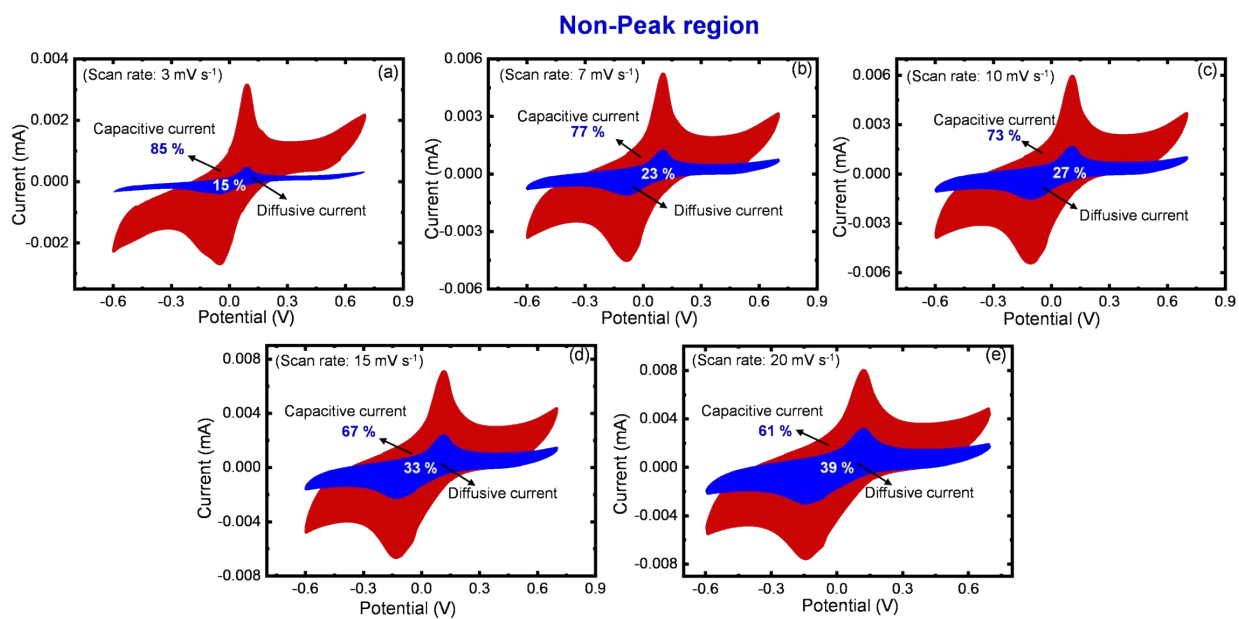

**Fig. S7.** Representative CV profiles at various scan rates marked with the capacitive and the diffusive contributions at non-peak potential region for the HEO cathodes.

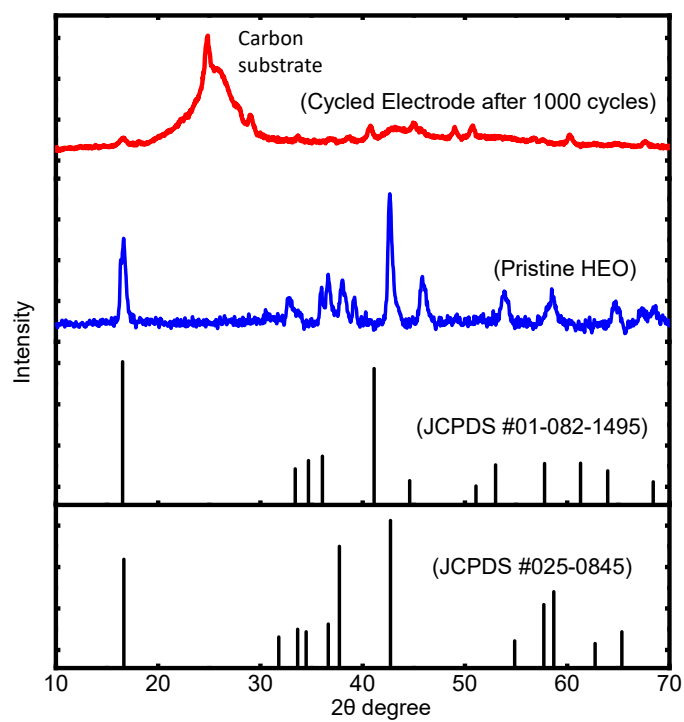

**Fig. S8.** Post-mortem XRD pattern of the cycled electrode after 1000 cycles.

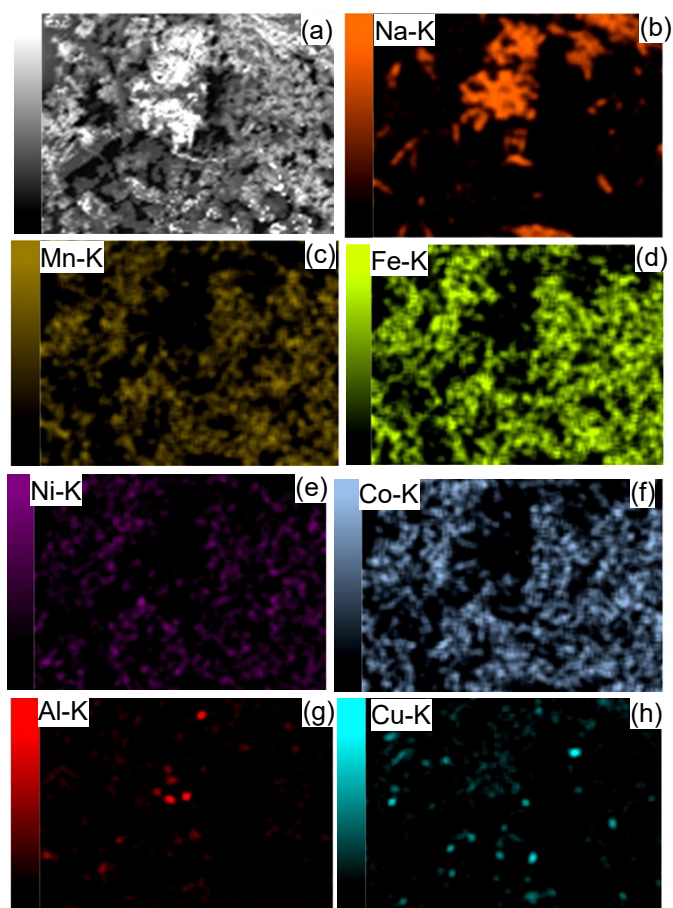

**Fig. S9.** (a) Representative area examined for the elemental mapping of (b) Na-K, (c) Mn-K, (d) Fe-K, (e) Ni-K, (f) Co-K, (g) Ni-K and (h) Cu-K.

## Calculation of the charge compensation for the HEO cathode

Cathode:  $\text{NaMn}_{0.2}\text{Ni}_{0.2}\text{Co}_{0.2}\text{Fe}_{0.2}\text{Al}_{0.1}\text{Cu}_{0.1}\text{O}_2$

$$x(+1) + \sum_i x_i(V_i) + 2(-2) = 0$$

$$1 + ((0.2 \cdot 4) + (0.2 \cdot 2) + (0.2 \cdot 3) + (0.2 \cdot 3) + (0.1 \cdot 2) + (0.1 \cdot 3)) - 4 = 0$$

where  $V_i$  are TM oxidation states and the oxygen are assumed to be +2 and -2, respectively. Based on the calculation, the overall charge of the HEO cathode is consistent with charge neutrality.
